# Supplementary material for: Cerebral Hemodynamics in Patients with Hemolytic Uremic Syndrome Assessed by Susceptibility Weighted Imaging and Four-Dimensional Non-Contrast MR Angiography
Source: PLoS One. 2016 Nov 1;11(11):e0164863. doi: 10.1371/journal.pone.0164863 (PMC5089757; doi:10.1371/journal.pone.0164863)
Supplement: S2 Table — Note: f = female, m = male, n/a = not available, * = parameters obtained at the time of MRI were not available; values at presentation to the hospital are given (not included in the statistical analysis). (XLS) [file pone.0164863.s002.xls]

## Sheet: Sheet1
ID	Sex	Age [years]	Blood pressure [mmHg]	Heart rate [bpm]	Hb [g/dl] @MRI Norm: 14-17.5	Hk [%] @MRI Norm: 36-48	Creatinine [mg/dl]	Creatinine reference [mg/dl]	Urea [mg/dl]	Urea reference [mg/dl]
1	m	55.2219	153/70	61	6	19.1	3	(0.5 - 1.0)	21	(7 - 19)
2	f	56.3973	150/74	78	6.2	18.3	2.9	(0.5 - 1.0)	12	(7 - 19)
3	f	67.2329	155/72	92	7.1	n/a	0.87	(0.6 - 1.2)	11	(9 - 21)
4	m	32.0849	139/72	65	9	24.8	4.6	(0.5 - 1.0)	76	(7 - 19)
5	f	56.2137	122/52	69	9	23.6	0.8	(0.6 - 1.2)	8	(9 - 21)
6	f	38.9671	146/68	105	7.9	22.5	4.45	(0.5 - 1.0)	22	(7 - 19)
7	f	21.3068	162/72	97	8.3	28.2	6.3	(0.5 - 1.0)	86	(7 - 19)
8	f	29.7753	141/89	89	8.8	24.5	2.73	(0.5 - 1.0)	11	(7 - 19)
9	m	75.5781	127/63	64	8.2	23.9	5.36	(0.6 - 1.3)	34	(8 - 26)
10	m	12.1644	n/a	n/a	7.7	23	3.2	(0.5 - 1.0)	23	(10 - 20)
11	f	10.6247	n/a	n/a	6.9	19.8	2.79	(0.5 - 1.0)	44	(10 - 20)
12	m	5.28219	n/a	n/a	9.5	25.9	3.1	(0.6 - 1.3)	79	(8 - 26)
13	f	25.8247	n/a	n/a	5	14.3	0.97	(0.6 - 1.3)	26	(8 - 26)
14	f	20.5479	194/75	74	7.8	21	7.92	(0.20 - 0.75)	63	(7 - 17)
16	f	31.8603	98/47	89	6.4	18.6	2.4	(0.5 - 1.0)	18	(10 - 20)
17	f	40.9123	n/a	n/a	8.2	22.9	4.27	(0.5 - 1.0)	63	(10 - 20)
18	m	66.4685	n/a	n/a	9.2	27.3	5.39	(0.6 - 1.2)	56	(9 - 21)
19	f	36.4658	104/69	85	7.4	22.7	2.46	(0.5 - 1.0)	56	(10 - 20)
21	f	22.3726	n/a	n/a	9.8*	29.8*	2.83	(0.5 - 1.0)	31	(10 - 20)
22	f	41.6767	n/a	n/a	8.1	24.1	4.6	(0.5 - 1.0)	94	(7 - 19)
27	f	65.274	98/48	81	8.2	19.1	3.57	(0.5 - 1.0)	60	(7 - 19)
28	f	31.0548	145/80	95	7.6	22.5	2.19	(0.6 - 1.2)	58	(9 - 21)
31	f	60.8904	144/72	88	7.7	23	7.8	(0.5 - 1.0)	74	(7 - 19)
32	f	39.337	128/83	92	7.5	22.6	3.18	(0.5 - 1.0)	25	(7 - 19)
34	f	5.36438	n/a	n/a	8.4	23.5	2.46	(0.6 - 1.3)	108	(8 - 26)
37	m	44.2438	n/a	n/a	11.1	33.1	1.02	(0.2 - 0.7)	26	(7 - 17)
38	m	69.9781	n/a	n/a	12.6	37.2	6.68	(0.3 - 0.79)	89	(7 - 17)
39	f	40.6932	n/a	n/a	9.2	26.7	5.77	(0.20 - 0.70)	132	(7 - 17)
41	m	28.4658	n/a	n/a	7.6	22.1	9.7	(0.5 - 1.0)	102	(7 - 19)
42	m	25.2959	n/a	n/a	7.1	19.9	3.7	(0.5 - 1.0)	64	(7 - 19)
43	m	26.1014	n/a	n/a	8.6	24.9	0.95	(0.5 - 1.0)	16	(10 - 20)
45	f	29.7699	n/a	n/a	9	25.5	3.62	(0.5 - 1.0)	40	(7 - 19)
46	m	53.9041	n/a	n/a	8.1	24.8	4.15	(0.5 - 1.0)	50	(7 - 19)
47	f	27.0932	n/a	n/a	8.7	24.6	0.85	(0.6 - 1.3)	7	(8 - 26)
48	m	66.0384	n/a	n/a	7.8	23.5	5.1	(0.5 - 1.0)	71	(7 - 19)
50	f	13.3918	n/a	n/a	9.5	28.8	1.2	(0.6 - 1.3)	17	(8 - 26)
Patients excluded (below)
15	f	71
20	m	67.2027
23	f	26.3863	n/a	n/a	8.6	24.6	3.3	(0.5 - 1.0)	36	(7 - 19)
24	m	38.3425	104/71	97	7.7	23.6	1.3	(0.5 - 1.0)	18	(7 - 19)
25	f	26.1562	140/96	99	6.7	18.3	1	(0.5 - 1.0)	15	(7 - 19)
26	m	63.0301	n/a	n/a	9.1	25.7	3.5	(0.5 - 1.0)	28	(7 - 19)
29	f	35.0493	n/a	n/a	6.9	20.6	6.74	(0.5 - 1.0)	119	(7 - 19)
30	m	37.463	125/46	100	8.7	21.3	5.62	(0.6 - 1.3)	118	(8 - 26)
33	m	75.0247	n/a	n/a	8.6	25.2	3.9	(0.6 - 1.3)	49	(8 - 26)
36	m	31.5
35	f	67.1288	132/46	106	7.4	22	1.4	(0.5 - 1.0)	11	(7 - 19)
40	f	79.9562	181/102	84	10.6	32.7	2.69	(0.5 - 1.0)	21	(10 - 20)
44	f	11.8466	n/a	n/a	6.7	19	0.9	(0.5 - 1.0)	11	(7 - 19)
49	f	14.3288	n/a	n/a	8.2	23.6	0.8	(0.5 - 1.0)	6	(7 - 19)
51	f	22.9918	123/70	86	12.9	39.7	1.08	(0.6 - 1.2)	6	(9 - 21)
